# Supplementary material for: Food-Based Dietary Guidelines around the World: Eastern Mediterranean and Middle Eastern Countries
Source: PubMed Central journal article supplement (PMC6627223; doi:10.3390/nu11061325), 2019-06-13
Supplement: nutrients-11-01325-s001.pdf [file nutrients-11-01325-s001.pdf]

**Supplementary Table 1.** Food-Based Dietary Guidelines sources for EMR countries.

| <b>Countries</b> | <b>Sources</b>                                                                                                                                                                                                                                                                                                                                                                                                                     |
|------------------|------------------------------------------------------------------------------------------------------------------------------------------------------------------------------------------------------------------------------------------------------------------------------------------------------------------------------------------------------------------------------------------------------------------------------------|
| Afghanistan      | <a href="http://nutritionmoph.gov.af/attachments/article/92/SOP%20for%20Public%20Nutrition%20English.pdf">http://nutritionmoph.gov.af/attachments/article/92/SOP%20for%20Public%20Nutrition%20English.pdf</a> ;<br><a href="http://www.fao.org/nutrition/education/food-dietary-guidelines/regions/countries/afghanistan/en/">http://www.fao.org/nutrition/education/food-dietary-guidelines/regions/countries/afghanistan/en/</a> |
| Iran             | <a href="http://www.fao.org/nutrition/education/food-dietary-guidelines/regions/countries/iran/en/">http://www.fao.org/nutrition/education/food-dietary-guidelines/regions/countries/iran/en/</a>                                                                                                                                                                                                                                  |
| Lebanon          | <a href="http://www.fao.org/nutrition/education/food-dietary-guidelines/regions/countries/lebanon/en/">http://www.fao.org/nutrition/education/food-dietary-guidelines/regions/countries/lebanon/en/</a>                                                                                                                                                                                                                            |
| Oman             | <a href="http://www.fao.org/nutrition/education/food-dietary-guidelines/regions/countries/oman/en/">http://www.fao.org/nutrition/education/food-dietary-guidelines/regions/countries/oman/en/</a>                                                                                                                                                                                                                                  |
| Qatar            | <a href="http://www.fao.org/nutrition/education/food-dietary-guidelines/regions/countries/qatar/en/">http://www.fao.org/nutrition/education/food-dietary-guidelines/regions/countries/qatar/en/</a>                                                                                                                                                                                                                                |
| Saudi Arabia     | <a href="http://www.moh.gov.sa/en/HEALTHAWARENESS/Pages/SaudihealthFoodGuide.aspx">http://www.moh.gov.sa/en/HEALTHAWARENESS/Pages/SaudihealthFoodGuide.aspx</a> ;<br><a href="http://www.moh.gov.sa/endepts/Nutrition/Pages/Palmfood.aspx">http://www.moh.gov.sa/endepts/Nutrition/Pages/Palmfood.aspx</a>                                                                                                                         |
| Yemen            | <a href="http://www.cmamforum.org/Pool/Resources/YEMEN-National-Nutrition-Strategy-2009.pdf">http://www.cmamforum.org/Pool/Resources/YEMEN-National-Nutrition-Strategy-2009.pdf</a>                                                                                                                                                                                                                                                |
